# Supplementary material for: Molecular Characterization of Near Full-Length Genomes of Hepatitis B Virus Isolated from Predominantly HIV Infected Individuals in Botswana
Source: MDPI journal article supplement (doi:10.3390/genes9090453), 2018-09-07
Supplement: s1 [file s1]

**Table S1.** Immune selection pressure results determined using fixed effects likelihood in the DataMonkey.

| ORF  | Sub-genotype | Type of HBV | Positively selected codon position | Negatively selected codon positions |           |       |        |       |       |
|------|--------------|-------------|------------------------------------|-------------------------------------|-----------|-------|--------|-------|-------|
| Core | D            | OBI         | None                               | 29                                  | 30        | 43    | 48     | 68    | 90    |
|      |              |             |                                    | 92                                  | 96        | 107   | 145    |       |       |
| Core | D            | CHB         | None                               | 4                                   | 97        | 117   |        |       |       |
| Core | A            | OBI         | None                               | 48                                  | 96#       | 122 # |        |       |       |
| Core | A            | CHB         | None                               | 7                                   | 34        | 43    | 45     | 69    | 96#   |
|      |              |             |                                    | 99                                  | 114       | 122 # | 145    |       |       |
| Pol  | D            | OBI         | None                               | rt24<br>1                           | rt318     | rh37  | rh49   | rh65  | rh69  |
| Pol  | D            | CHB         | None                               | tp4<br>7                            | rt32      | rt142 | rh30   | rh66  | rh100 |
| Pol  | A            | OBI         | None                               | tp1<br>06                           | tp13<br>2 | sp95  | rt241# | rt281 | rh20# |
| Pol  | A            | CHB         | rt271                              | tp1<br>5                            | tp48      | tp64  | tp66   | tp69  | tp80  |
|      |              |             |                                    | tp9<br>5                            | tp10<br>9 | tp132 | tp144  | tp157 | tp171 |
|      |              |             |                                    | rt24<br>1#                          | rt249     | rt251 | rt259  | rt279 | rt282 |
|      |              |             |                                    | rt28<br>6                           | rt307     | rt317 | rt320  | rt334 | rh19  |
|      |              |             |                                    | rh2<br>0#                           | rh26      | rh43  | rh56   | rh58  | rh81  |
|      |              |             |                                    | rh9<br>2                            | rh10<br>1 |       |        |       |       |
| X    | D            | OBI         | none                               | 86                                  |           |       |        |       |       |
| X    | D            | CHB         | none                               | 80                                  |           |       |        |       |       |
| X    | A            | OBI         | none                               | 95                                  |           |       |        |       |       |

|           |   |     |      |          |     |     |    |    |    |
|-----------|---|-----|------|----------|-----|-----|----|----|----|
| S         | A | OBI | none | 101<br># |     |     |    |    |    |
| S         | A | CHB | none | 101<br># | 148 |     |    |    |    |
| PreS<br>1 | D | OBI | none | 70       |     |     |    |    |    |
| PreS<br>1 | D | CHB | none | 28       |     |     |    |    |    |
| PreS<br>1 | A | OBI | none | 7#       | 20  | 42# | 85 |    |    |
| PreS<br>1 | A | CHB | 90   | 7#       | 29  | 42# | 44 | 46 | 56 |
| PreS<br>2 | A | OBI | none | 10       |     |     |    |    |    |

Immune selection pressure was determined in codons using fixed effects likelihood in the DataMonkey. ORF: open reading frame; HBV: hepatitis B virus; OBI: occult hepatitis B infections; CHB: chronic hepatitis B infections; Pol: Polymerase; S: Surface; PreS1: pre-surface1; PreS2: pre-surface2. The symbol # depicts codons which are under negative selection pressure in both OBI and CHB participants. Codons corresponding to OBI associated mutations positions are shown in bold.

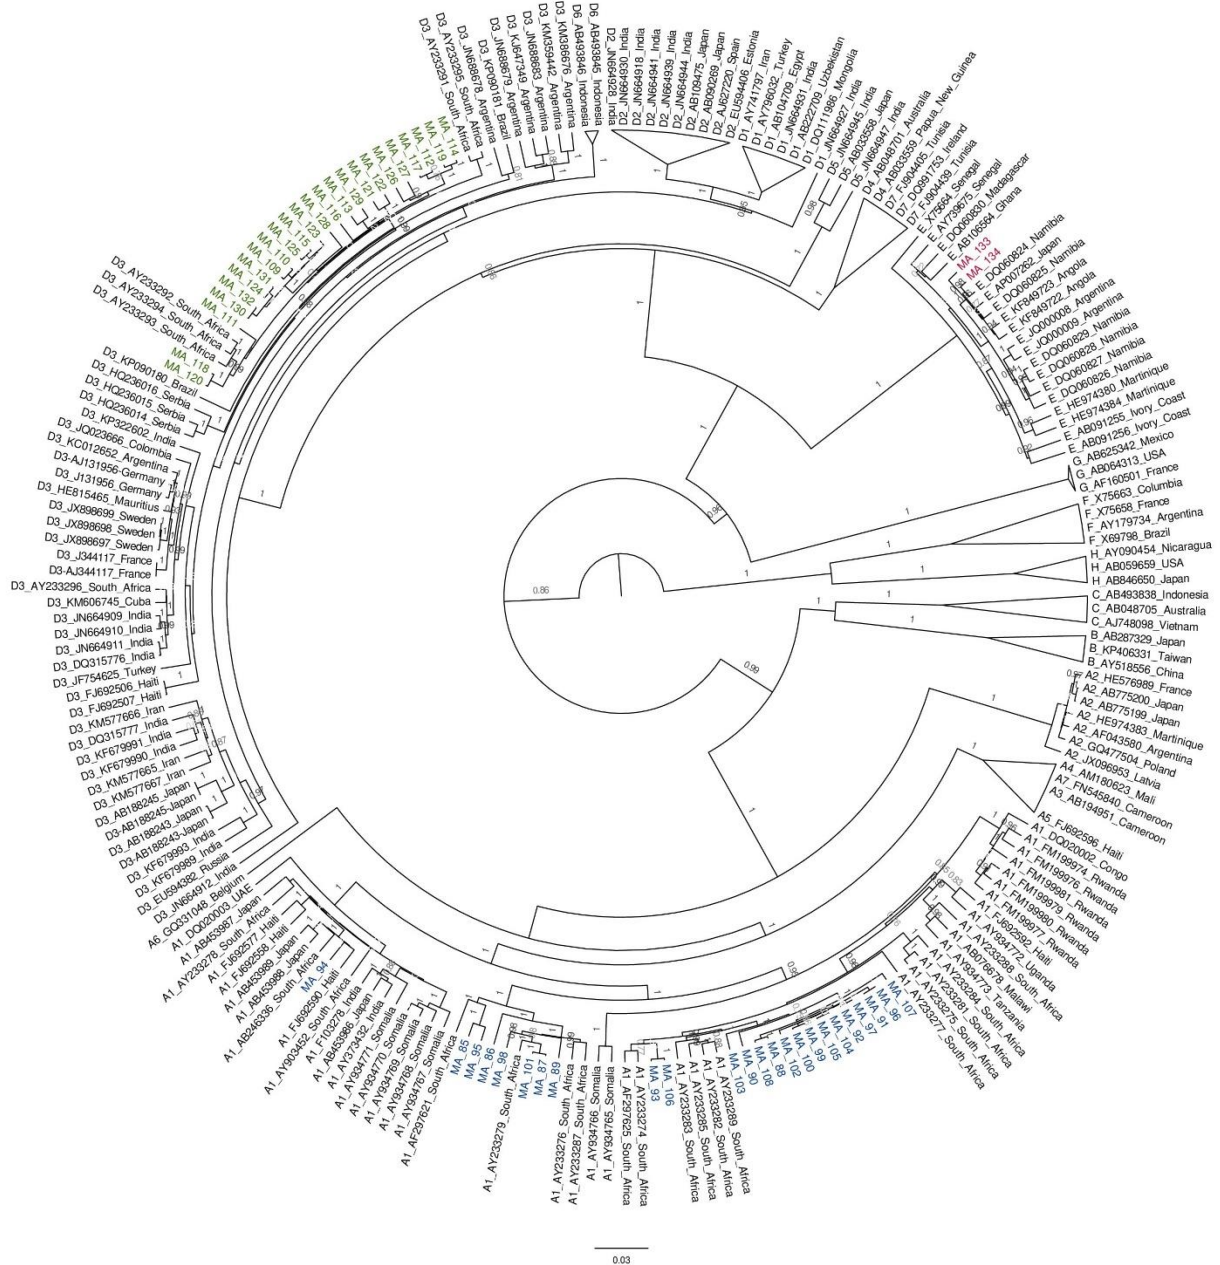

**Figure S1.** A phylogenetic tree of the nearly whole genome hepatitis B virus (HBV) sequences generated by Bayesian Evolutionary Analysis by Sampling Trees (BEAST). Subgenotype A1 sequences from Botswana are highlighted in blue, subgenotype D3 sequences in green, and genotype E sequences in red. Black sequences represent GenBank references named by their subgenotype, accession number, and country of origin.
